# Supplementary material for: Toll-Like Receptor 9 Promotes Survival in SERCA2a KO Heart Failure Mice
Source: Hindawi journal article supplement (doi:10.1155/2017/9450439), 2017-01-01
Supplement: f2 [file 9450439.f2.pdf]

**S2 Table. Primer sequences used in RT PCR analyses.**

| Target         | Sequence (5'→3')                                                 | Acc.nr    |
|----------------|------------------------------------------------------------------|-----------|
| ANP            | (+)-CAGATCTGATGGATTTCAAGAACCT<br>(-)-GCTTCCTCAGTCTGCTCACTCA      | NM_008725 |
| BNP            | (+)- GAGCAATTCAAGATGCAGAAGCT (-)-<br>GTGAGGCCTTGGTCCTTCAA        | NM_008726 |
| pMHC           | (+)-CAACCCTGGAGACCAAGCA<br>(-)-GCTCAAAGCTGTTGAAATCGAA            | NM_080728 |
| aSMA           | (+)-CGGGAGAAAATGACCCAGATT<br>(-)-GGACAGCACAGCCTGAATAGC           | NM_007392 |
| Col I          | (+)-CCTGAGTCAGCAGATTGAGAACA<br>(-)-TCGATCCAGTACTCTCCGCTCT        | NM_007742 |
| Col III        | (+)-TCTATGAATGGTGGTTTTTCAGTTCA<br>(-)-TTTTTGCAGTGGTATGTAATGTTCTG | NM_009930 |
| GAPDH          | (+)-CCAAGGTCATCCATGACAACCT<br>(-)-AGGGGCCATCCACAGTCTT            | NM_008084 |
| IFN $\alpha$ 1 | (+)-CCTGAACATCTTCACATCAAAGGA<br>(-)-GAGCTGCTGGTGGAGGTCAT         | NM_010502 |
| IFN $\beta$    | (+)-CCATCATGAACAACAGGTGGAT<br>(-)-GAGAGGGCTGTGGTGGAGAA           | NM_010510 |
| IL-6           | (+)-TCTAATTCATATCTTCAACCAAGAGGTAA<br>(-)-GAATTGGATGGTCTTGGTCCTTA | NM_031168 |
| TNF            | (+)-AGACCCTCACACTCAGATCATCTTC<br>(-)-CCACTTGGTGGTTTGCTACGA       | NM_013693 |

Acc.nr., GenBank Accession number; (+): forward primer, (-): reverse primer. ANP, atrial natriuretic peptide; BNP, brain natriuretic peptide; pMHC, Beta myosin heavy chain; aSMA, alpha smooth muscle actin; Col I, Collagen I; Col III, Collagen III; GAPDH, glyceraldehyde 3-phosphate dehydrogenase; IFN, interferon; IL, interleukin; TNF, tumor necrosis factor.
