# Supplementary material for: Toll-Like Receptor 9 Promotes Survival in SERCA2a KO Heart Failure Mice
Source: Mediators Inflamm. 2017 Apr 11;2017:9450439. doi: 10.1155/2017/9450439 (PMC5405589; doi:10.1155/2017/9450439)
Supplement: Supplementary file 1 — To reduce animal suffering and distress, mice were observed daily, registering morbidity according to pre-specified criteria. The individual mice were scored 0 to 4 for different indicators of morbidity as listed in the table. Mice with a total score >8 were euthanized. [file 9450439.f1.pdf]

***Dhondup et al. “ Toll-like receptor 9 promotes survival in SERCA2a KO heart failure mice”***

## **Supplementary Online Material**

### **Supporting Tables**

**S1 Table. Pre-specified criteria for evaluating morbidity.**

|                  |          |                    |                         |                      |
|------------------|----------|--------------------|-------------------------|----------------------|
| Fur appearance   | Normal=0 | Reduced grooming=1 | Untidy fur=2            | Very untidy fur=4    |
| Behavior         | Normal=0 | Reduced activity=1 | Very reduced activity=2 |                      |
| Body weight loss | Normal=0 | Loss<5%=1          | Loss<10%=2              | Loss<15%=3           |
| Movement         | Normal=1 | Unsteady walk=2    | Circling walk=3         | Cannot move=4        |
| Euthanization    |          |                    |                         | If total score is> 8 |
